# Supplementary material for: Translation, cross-cultural adaptation and validation of the Work Role Functioning Questionnaire 2.0 into Brazilian Portuguese in a general population
Source: Health Qual Life Outcomes. 2022 Feb 3;20:17. doi: 10.1186/s12955-022-01924-y (PMC8812155; doi:10.1186/s12955-022-01924-y)
Supplement: Supplementary file 1 — Additional file 1. Brazilian version of the Work Role Functioning Questionnaire 2.0. [file 12955_2022_1924_MOESM1_ESM.pdf]

## Work Role Functioning Questionnaire 2.0

## SEU TRABALHO E SAÚDE

Estas questões pedem que você avalie a **quantidade de tempo** durante as **últimas quatro semanas** em que teve dificuldade para executar certas tarefas no seu trabalho.

A quantidade de tempo diz respeito às horas em que você trabalhou nas últimas quatro semanas.

Marque a caixa “Não se aplica ao meu trabalho” apenas se a questão descrever algo que não faz parte do seu trabalho.

Nas últimas quatro semanas, por quanto tempo durante o seu trabalho a sua saúde física ou problemas emocionais dificultaram que você fizesse o seguinte:

[illegible]

Nas últimas quatro semanas, por quanto tempo durante o seu trabalho a sua saúde física ou problemas emocionais dificultaram que você fizesse o seguinte:

[illegible]
